# Supplementary material for: A versatile carbohydrate based gelator for oil water separation, nanoparticle synthesis and dye removal
Source: Royal Society of Chemistry journal article supplement (doi:10.1039/c6nj03520e), 2017-01-01

## **Electronic Supplementary Information**

### **A versatile carbohydrate based gelator for the oil water separation, nanoparticles synthesis and dye removal**

Chintam Narayana<sup>a</sup>, Ravi Kant Upadhyay<sup>a</sup>, Raman Chaturvedi<sup>a</sup> and Ram Sagar<sup>a\*</sup>

<sup>a</sup>Department of Chemistry, School of Natural Sciences, Shiv Nadar University (SNU)

NH91, Tehsil Dadri, Gautam Buddha Nagar, Uttar Pradesh 201314

\*Email: [ram.sagar@snu.edu.in](mailto:ram.sagar@snu.edu.in)

**Journal Name:** New Journal of Chemistry

## 1. Synthesis schemes

### 1.1. Scheme-S1 (Synthesis of Methyl 2-acetamido-2-deoxy- D-glucopyranoside)<sup>1</sup>

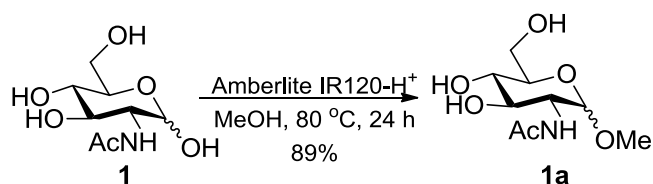

### 1.2. Scheme-S2 (Synthesis of Methyl 6-O-triphenylmethyl-2-acetamido-2-deoxy- $\alpha$ -D-glucopyranoside)<sup>2</sup>

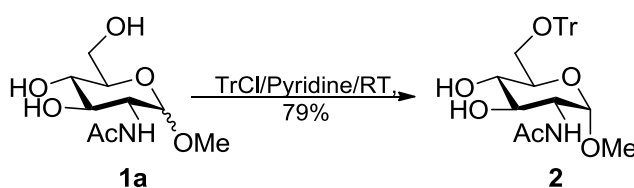

### 1.3 Scheme-S3 (Synthesis of Methyl 3,4-di-O-benzyl-6-O-triphenylmethyl-2-acetamido-2-deoxy- $\alpha$ -D-glucopyranoside)<sup>3</sup>

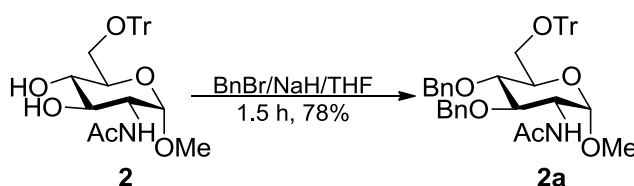

### 1.4. Scheme-S4 (Synthesis of Methyl 3,4-di-O-benzyl-2-acetamido-2-deoxy- $\alpha$ -D-glucopyranoside)<sup>4</sup>

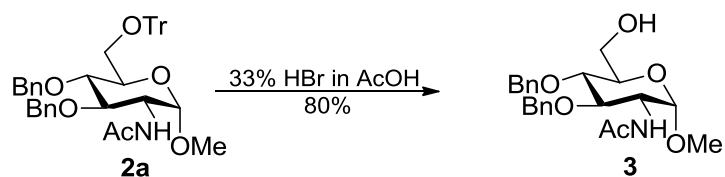

## References:

1. N. Goyal, H. P. R. Mangunuru, B. Parikh, S. Shrestha and G. Wang, *Beilstein J. Org. Chem.* 2014, **10**, 3111–3121
2. A. Roy, A. K. Ray, A. Mukherjee, N. Roy, *Indian J. of Chem., Sec B*: 1987, **26B**, 1165-1167

3. T. Suami, Kin-ichi Tadano, Y. Iimura, H. Tanabe, *Carbohydr. Res.* 1985, **135**, 319-323
4. a) L. Petersen and K. J. Jensen, *J. Chem. Soc., Perkin Trans. 1*, 2001, 2175-2182; b) M.L. Falcone-Hindley and J. T. Davis, *J. Org. Chem.* 1998, **63**, 5555-5561.

Table S1: Gelation abilities of gelator in various liquids

| Solvent       | Concentration<br>in wt% | CGC in wt% | Time required for completion of gelation |                  |                          |                     | Appearance |
|---------------|-------------------------|------------|------------------------------------------|------------------|--------------------------|---------------------|------------|
|               |                         |            | At room<br>temperature                   | Ice bath cooling | Water bath<br>sonication | Probe<br>sonication |            |
| Benzene       | 0.5                     | 0.41       | 9 min 54 sec                             | 4 min 58 sec     | 25 sec                   | 6 sec (0.55 wt %)   | TG         |
| Toluene       | 0.55                    | 0.35       | 3 min 54 sec                             | 52 sec           | 20 sec                   | 2 sec               | TG         |
| m-Xylene      | 0.55                    | 0.42       | 1 min 11 sec                             | 10 sec           | 41 sec                   | 2 sec               | TG         |
| p-Xylene      | 0.55                    | 0.41       | 1 min 10 sec                             | 15 sec           | 45 sec                   | 4 sec               | TG         |
| o-Xylene      | 0.55                    | 0.38       | 2 min 56 sec                             | 40 sec           | 1 min 6 sec              | 2 sec               | TG         |
| Mesitylene    | 0.55                    | 0.41       | 45 sec                                   | 32 sec           | 34 sec                   | 3 sec               | TG         |
| Chlorobenzene | 0.62                    | 0.5        | 16 min 15 sec                            | 4 min 15 sec     | ----                     | 4 sec (1wt%)        | TG         |
| Bromobenzene  | 1                       | 0.85       | 1 min 19 sec                             | 45 sec           | ----                     | ----                | TG         |
| Iodo benzene  | 0.63                    | 0.63       | 9 min 30 sec                             | 2 min 07 sec     | ----                     | ----                | TG         |

|                              |      |      |               |              |      |      |    |
|------------------------------|------|------|---------------|--------------|------|------|----|
| 1,2 dichlorobenzene          | 0.62 | 0.46 | 14 min 20 sec | 1min 30 sec  | ---- | ---- | TG |
| EtOH:H <sub>2</sub> O (1:2)  | 1.6  | ---- | 15 min        | 1 min 36 sec | ---- | ---- | OG |
| DMSO:H <sub>2</sub> O (1:2)  | 1    | ---- | 65 min        | ----         | ---- | ---- | TG |
| DMSO: H <sub>2</sub> O (1:1) | 1    | ---- | ----          | 1 min 50 sec | ---- | ---- | TG |
| Diesel                       | 2    | 2    | 3 min         | 54 sec       | ---- | ---- | OG |
| Petrol                       | 0.5  | 0.38 | 1 min 3 sec   | 54 sec       | ---- | ---- | TG |
| Aniline                      | 0.55 | ---- | S             | S            | ---- | ---- | S  |
| Nitro benzene                | 0.55 | ---- | S             | S            | ---- | ---- | S  |
| THF                          | 0.55 | ---- | S             | S            | ---- | ---- | S  |
| n-hexanol                    | 0.55 | ---- | S             | S            | ---- | ---- | S  |
| Ethylene glycol              | 0.55 | ---- | S             | S            | ---- | ---- | S  |

**TG** - Transparent gel, **OG** - Opaque gel and **S**-Soluble \*All CGC were calculated at room temperature

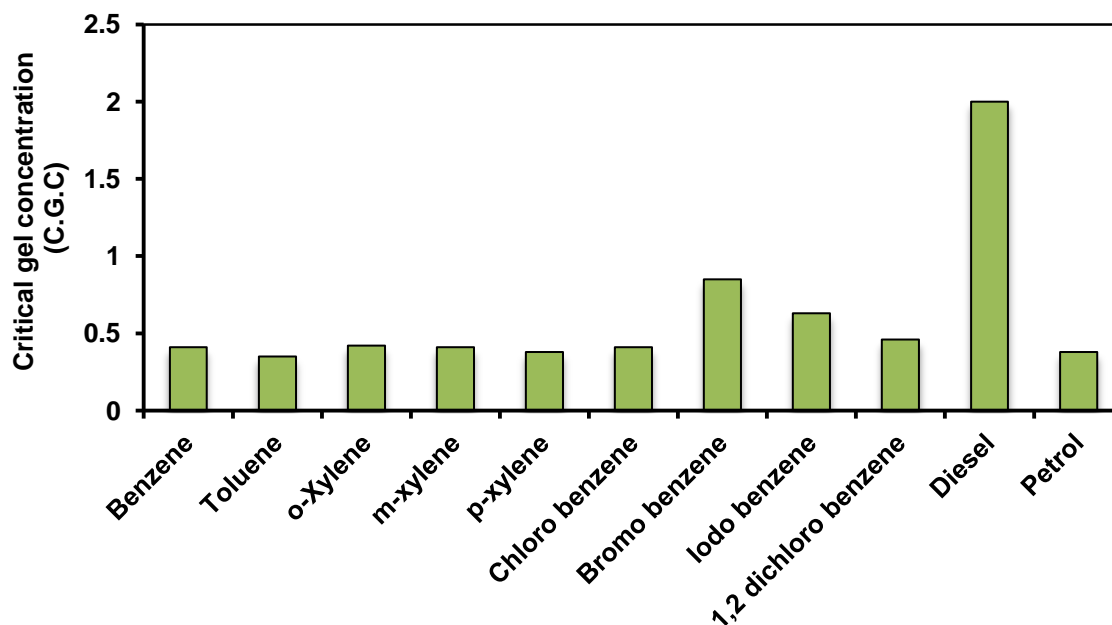

**Figure S1** Bar graph C.G.C values of gelator for some of the organic solvents and oils

## 2. Determination of gel-sol transition temperatures ( $T_{gel}$ )

Gel prepared using toluene and gelator was taken in a glass vial. A glass bead was placed on the top of gel sample and the vial was sealed. Afterward vial was heated in a thermo-stated oil bath and the temperature of the bath was increased at a rate of 0.1 °C /min using temperature controller. The temperature at which ball penetrates the gel and reaches to the bottom of the gel is regarded as the  $T_{gel}$  of the system.

The  $T_{gel}$  of the toluene gel was measured to be 68°C.

## 3. Characterization of the gelator

### 3.1 FTIR analysis of the gelator

IR spectrum of the gelator consists of following bands:

3294  $\text{cm}^{-1}$  (O-H stretching overlapping the N-H stretching), 3030 (ArC-H stretching), 2919  $\text{cm}^{-1}$  (C-H stretching), 1644  $\text{cm}^{-1}$  (amide II band, C-O stretching of the acetyl group), 1551  $\text{cm}^{-1}$  (amide II band, N-H bending) 1485–1380  $\text{cm}^{-1}$  (asymmetrical C-H bending of the  $\text{CH}_2$  group), 1373 and 1359  $\text{cm}^{-1}$  (C-H plane bending), 1070  $\text{cm}^{-1}$  (C-O-C stretching), 1055  $\text{cm}^{-1}$  (C-O-C stretching), 1040  $\text{cm}^{-1}$  (C-O stretching).

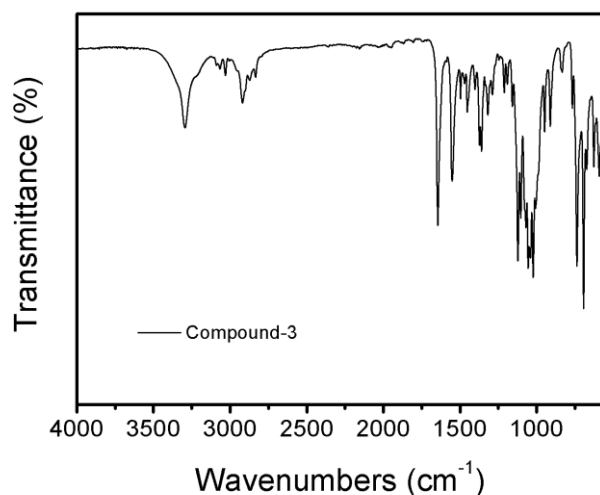

**Figure S2** FTIR spectrum of the gelator (Compound-3)

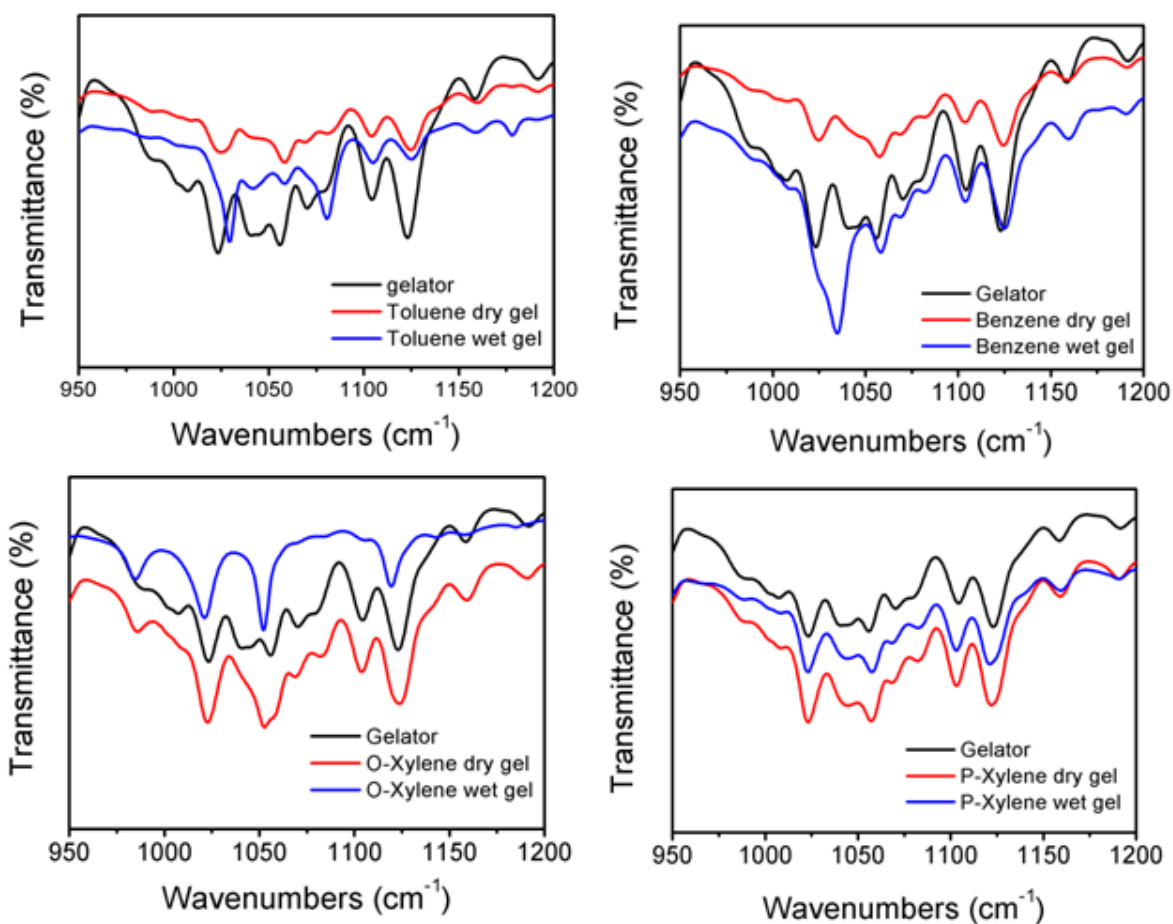

**Figure S3** FTIR spectra of the organogel having different organic solvents

### 3.2 UV-vis analysis of the gelator

The UV-vis spectrum of the gelator consists of peaks positioned at 210 and 257 nm which might be attributed to the  $\pi$ - $\pi^*$  transitions.

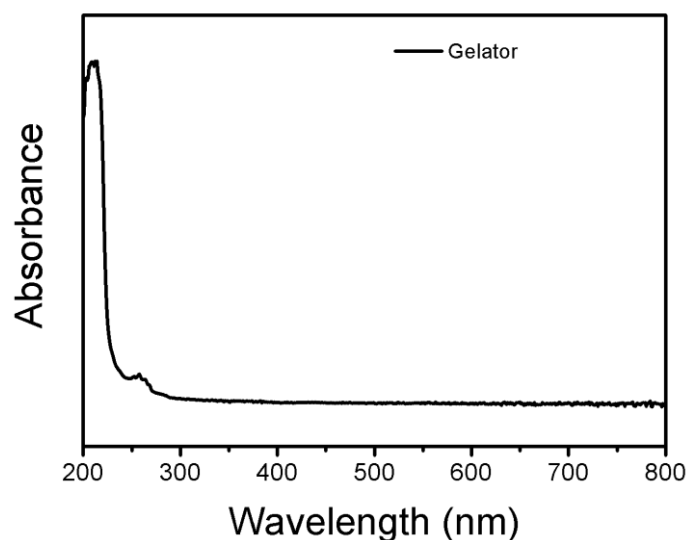

**Figure S4** UV-vis spectrum of the gelator

#### 4. Phase selective gelation of nonpolar solvents in presence of water

5 mg gelator and fixed volume of liquid were taken in a glass vial and sonicated, heated slowly to dissolve the gelator completely. Thereafter water (1 mL) was slowly added into the glass vial and resulting mixture was allowed to cool down to room temperature. Finally the vial was turned upside down and system was considered as gel if it doesn't fall down.

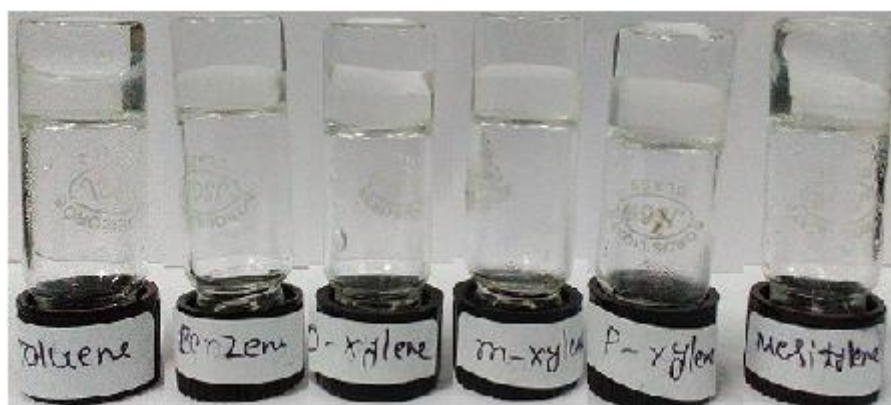

**Figure S5** Organogels holding water from left to right toluene, benzene, o-xylene, m-xylene, p-xylene and mesitylene

#### 5. Gel formation in polar solvents

Gelator **3** and DMSO: H<sub>2</sub>O in 1:2 ratio was taken in a glass vial and sonicated at room temperature (1 min), resulting mixture was kept at room temperature for a specified time (Table S1) to form gel and finally the vial was inverted (Figure S6). A system was considered as gel if it doesn't fall down on keeping vial upside down. Similarly procedure was applied for gel formation in EtOH: H<sub>2</sub>O (1: 2) co-solvent (Figure S6).



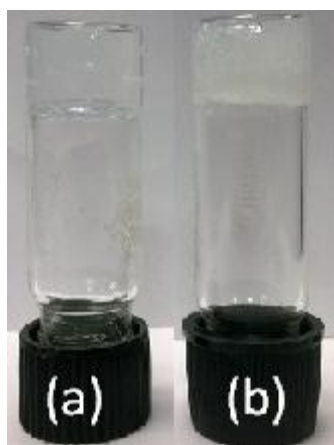

**Figure S6** Gels prepared by dissolving gelators in DMSO, EtOH and H<sub>2</sub>O in different ratio  
 (a) DMSO:H<sub>2</sub>O (1:2) at 0.5 mg/ 0.5 ml (b) EtOH:H<sub>2</sub>O (1:2) at 0.8 mg/0.5 ml

### 6. Copies of <sup>1</sup>H and <sup>13</sup>C NMR spectra of all compounds

NAR-GLY

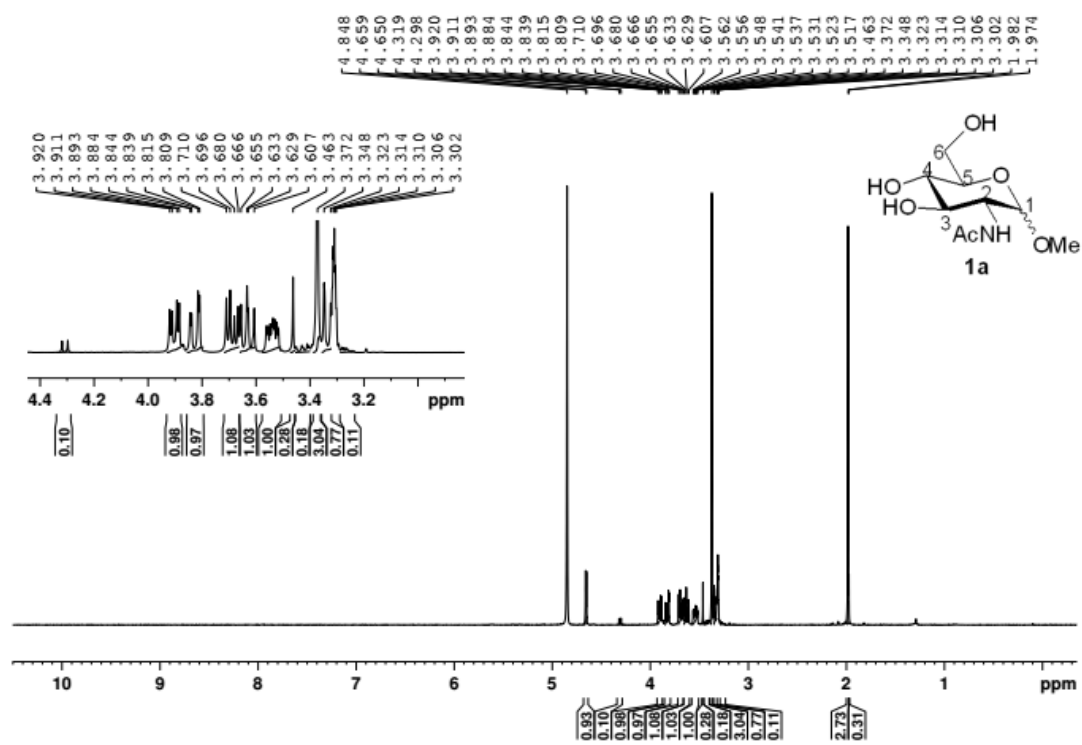

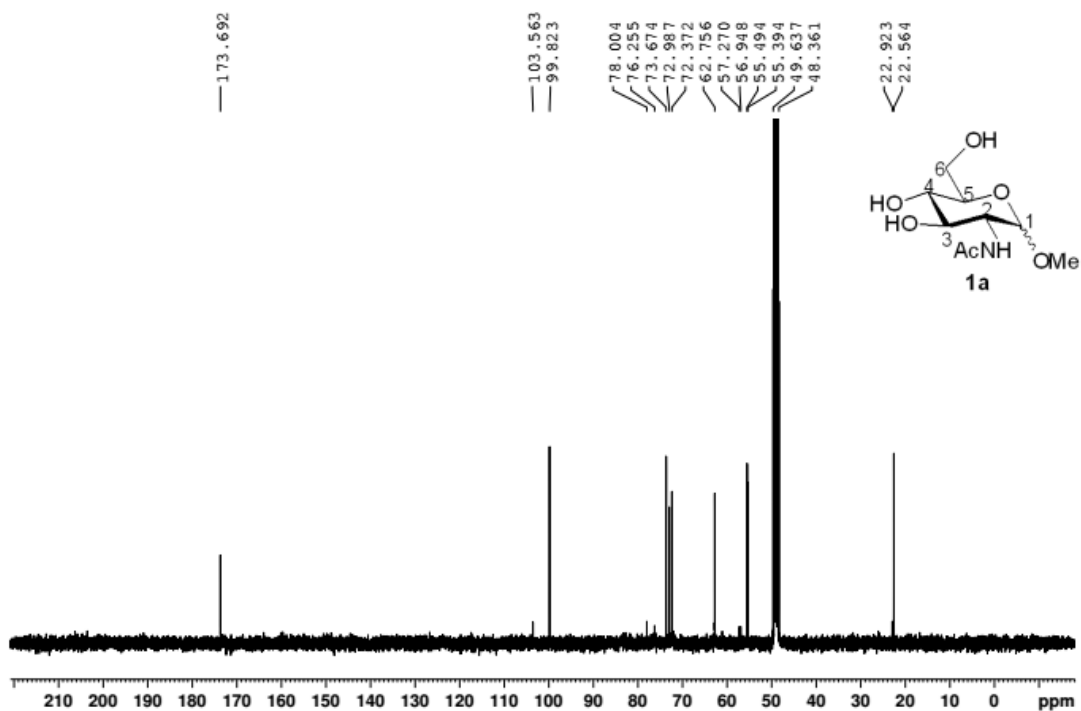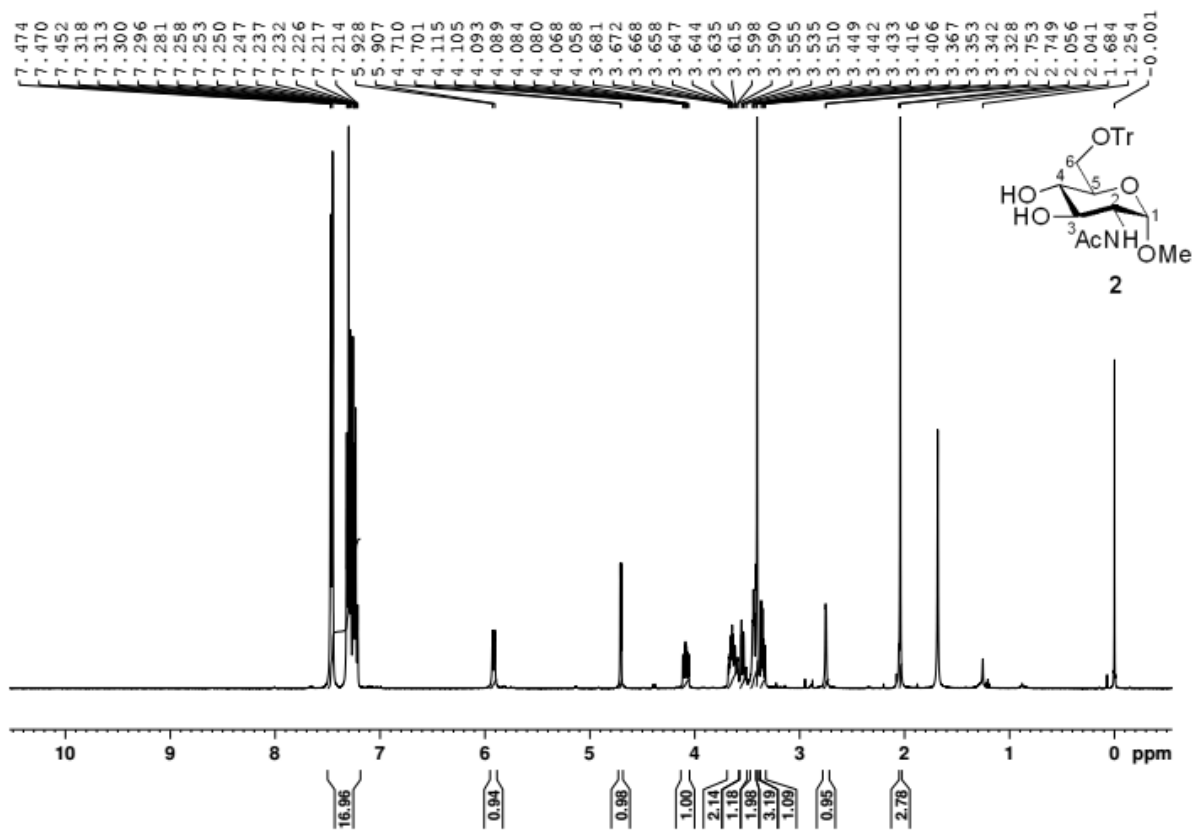

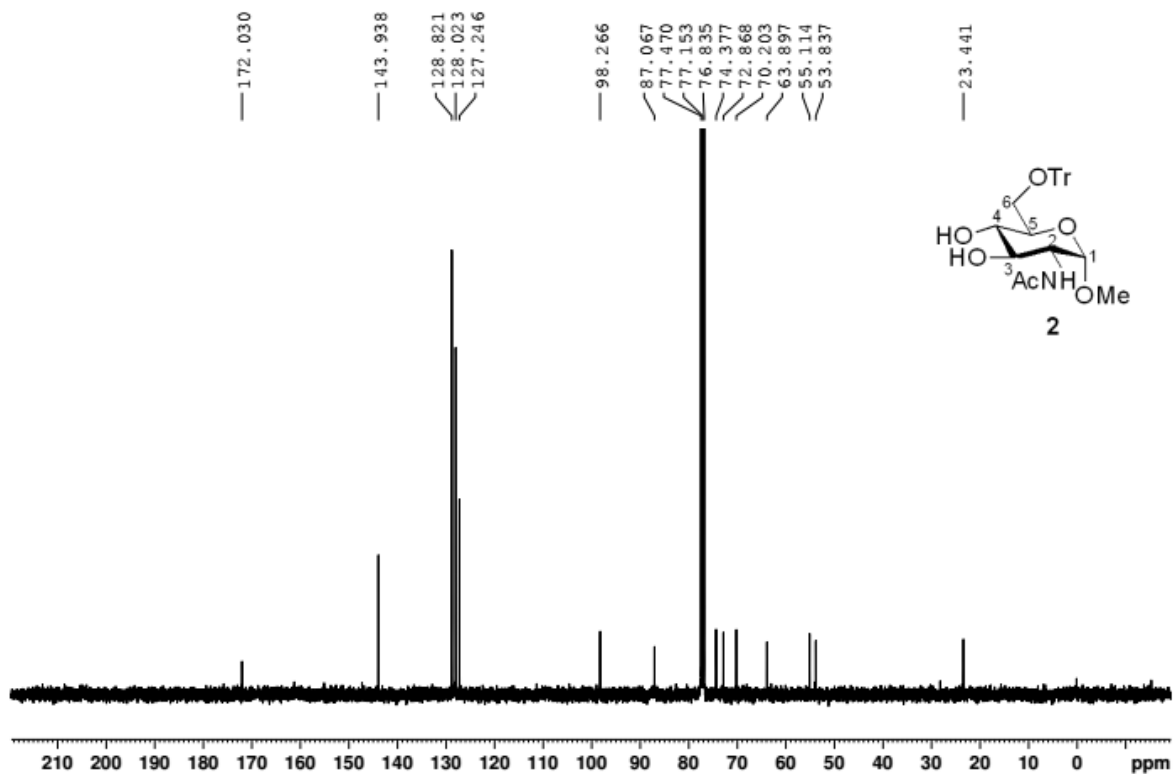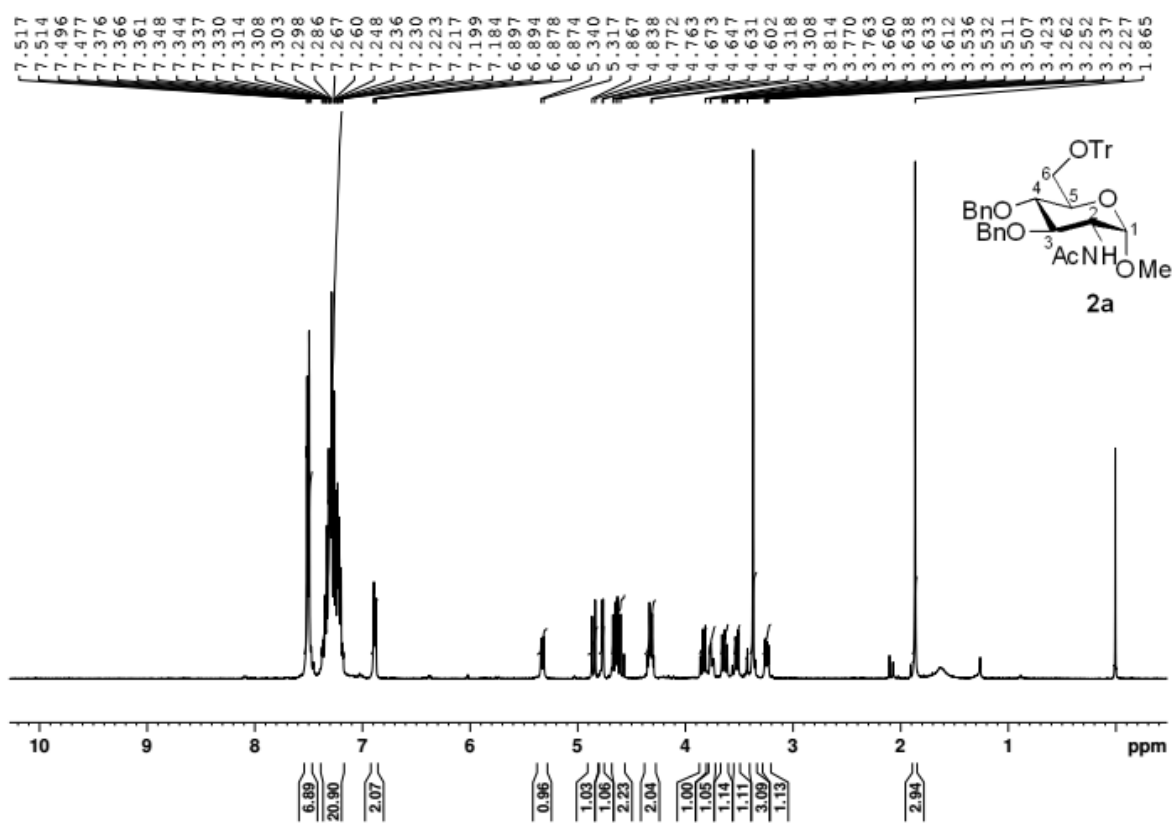

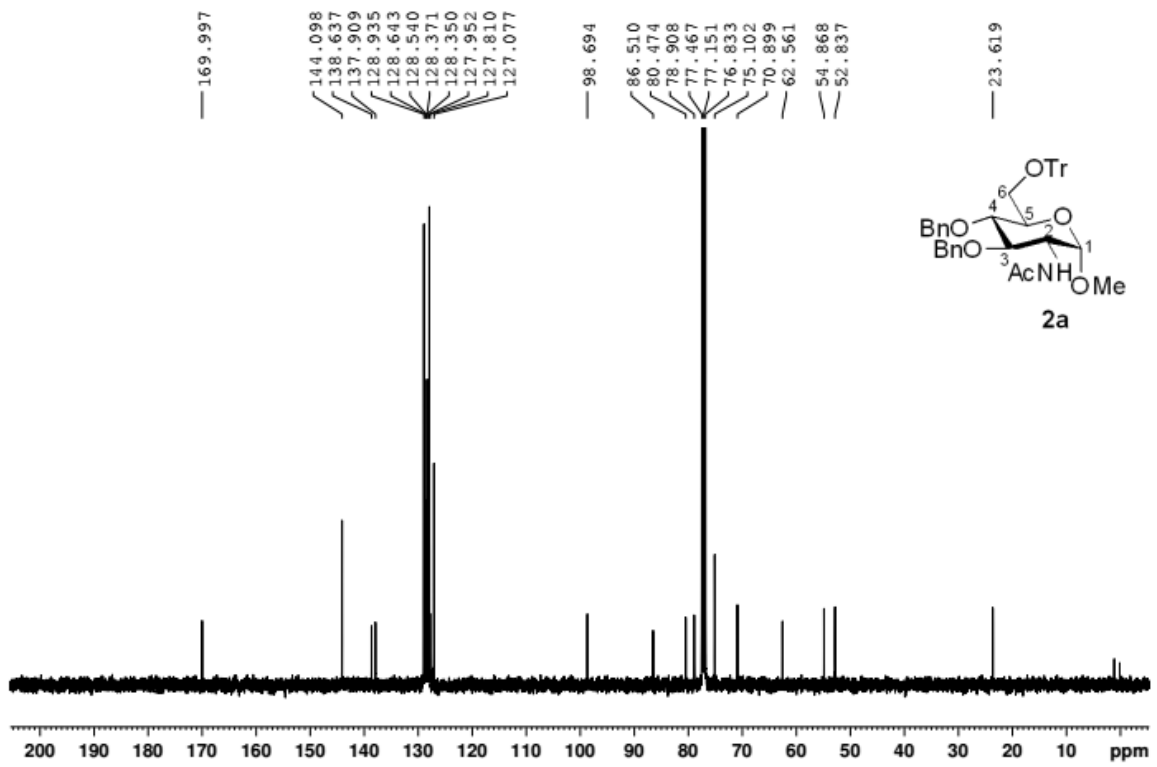

NAR-dt-1HNMR

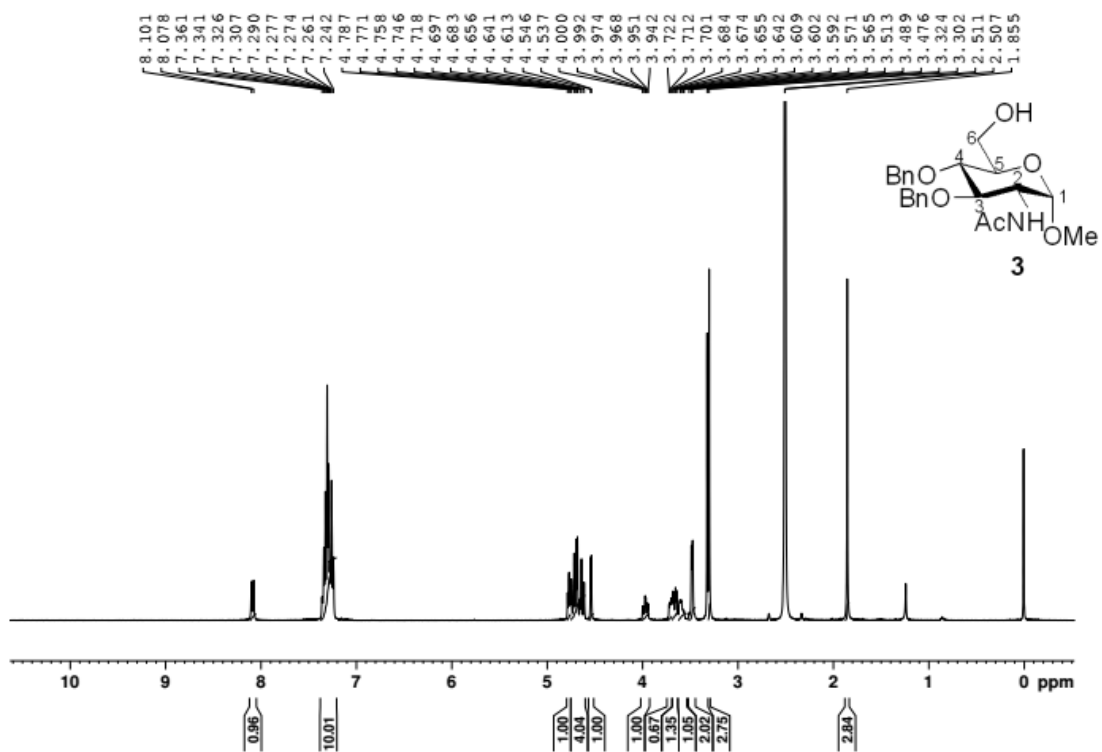

NAR-333-13C

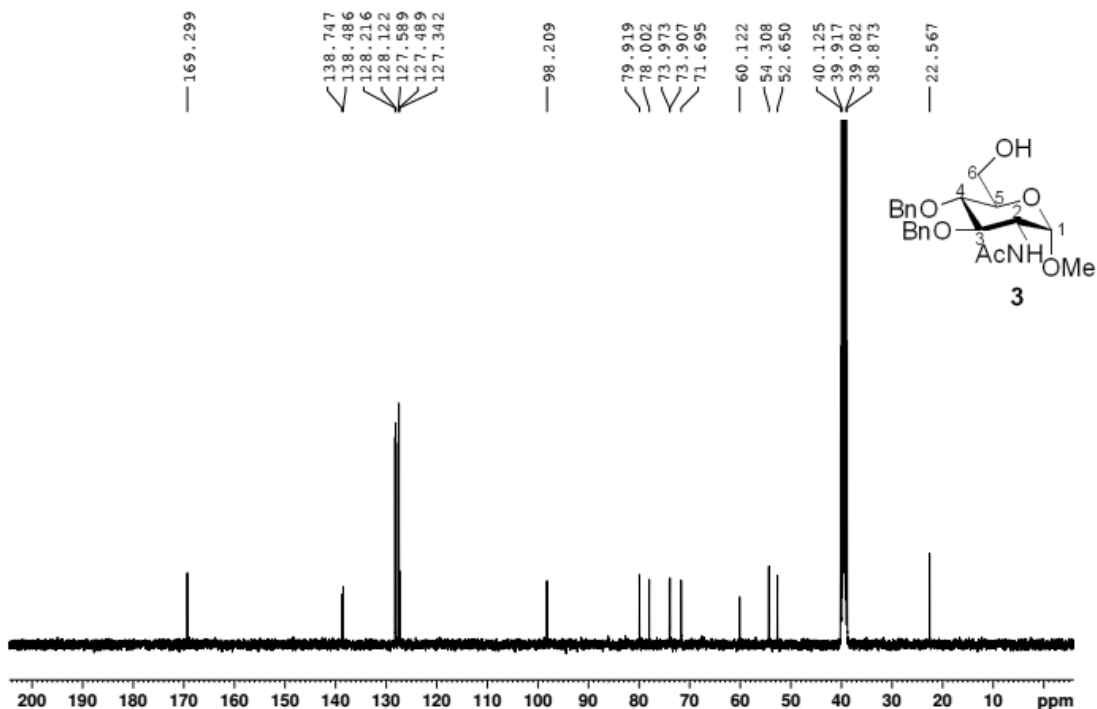

Supplement: c6nj03520e2.pdf [file c6nj03520e2.pdf]
